# Supplementary material for: A single-nucleus RNA-sequencing pipeline to decipher the molecular anatomy and pathophysiology of human kidneys
Source: PubMed Central journal article supplement (PMC6597610; doi:10.1038/s41467-019-10861-2), 2019-06-27
Supplement: 41467_2019_10861_MOESM1_ESM.pdf [file 41467_2019_10861_MOESM1_ESM.pdf]

## **SUPPLEMENTARY INFORMATION**

**A single-nucleus RNA-sequencing pipeline to decipher the molecular anatomy and pathophysiology of human kidneys**

***Lake et al.***

## Tissue Processing Assessments

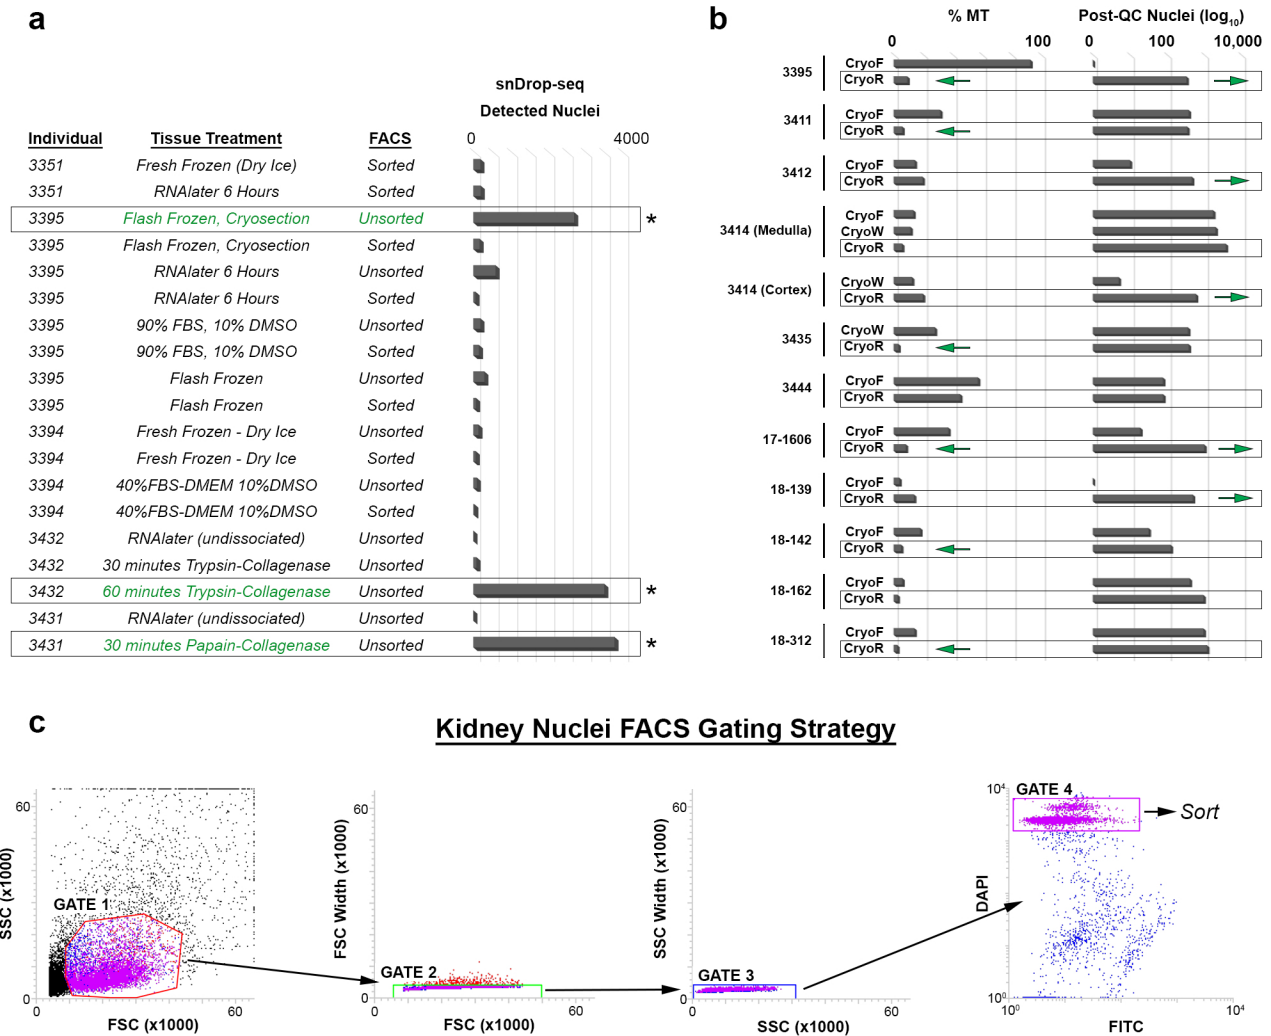

**Supplementary Figure 1. Adult human kidney tissue processing assessment.** **a.** Nuclei from different tissue preservation and processing methods within and across individuals ( $n = 5$ ) were processed by snDrop-seq and the number of nuclei ( $> 400$  UMI detected) relative to total number of nuclei loaded is shown. Asterisks indicate conditions showing positive outcome. **b.** Comparison of snDrop-seq outcome using nuclei isolated from cryosections from the same samples ( $n = 12$ ) that were treated in different ways (cryoF, cryoW, cryoR). Percent MT (nuclei  $>400$  UMI) and number of post-QC nuclei (nuclei  $> 400$  nonMT UMI,  $>400$  and  $< 5000$  genes detected) are shown. Arrows indicate lower percent MT and higher post-QC yields for cryoR samples. **c.** FACS gating strategies for DAPI stained kidney nuclei used in (a). Source data for (a) and (b) are provided as a Source Data File.

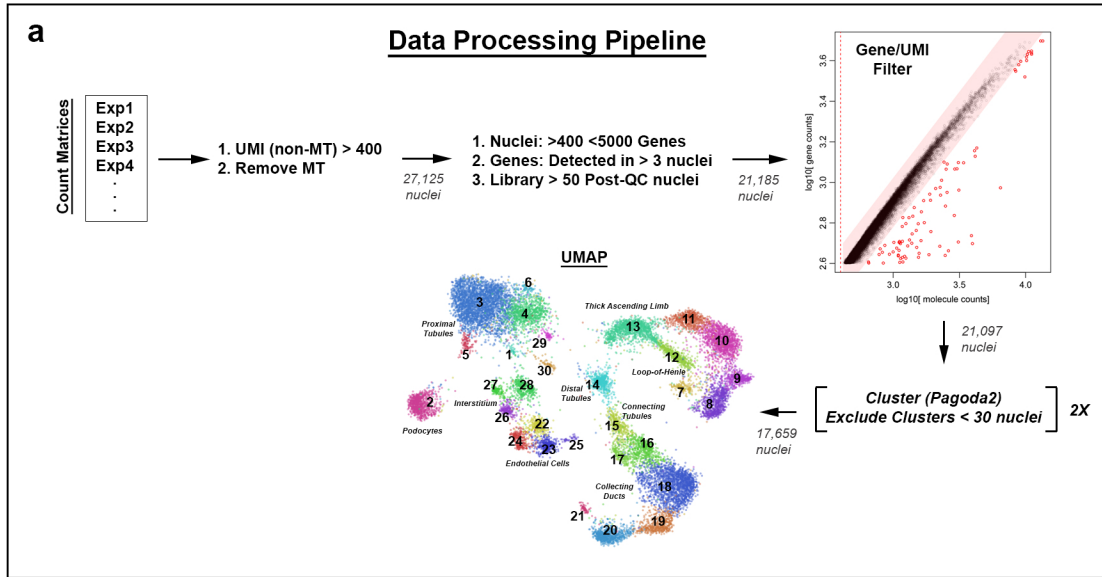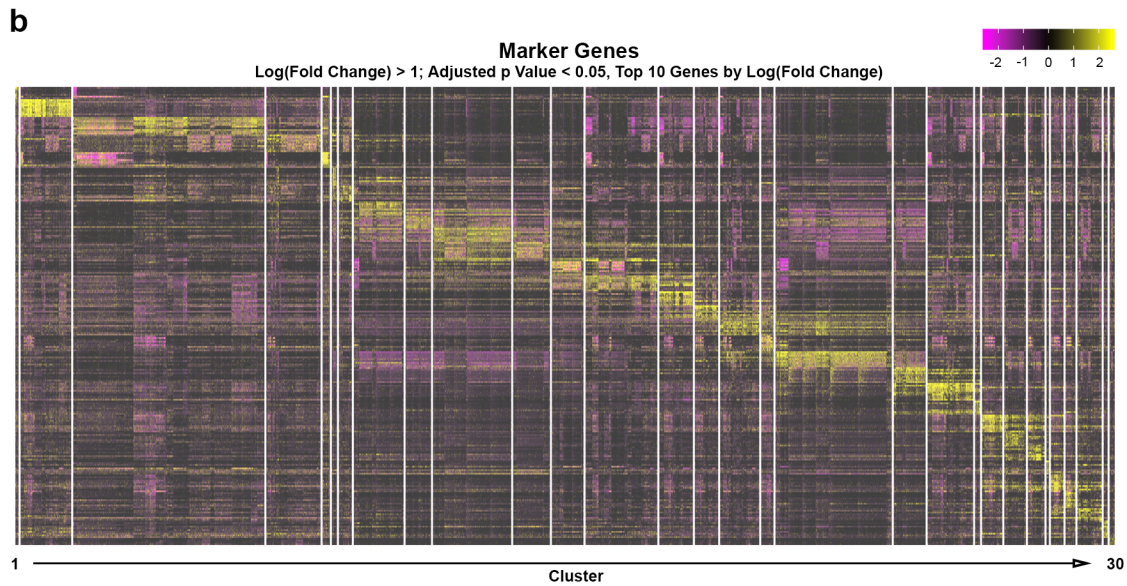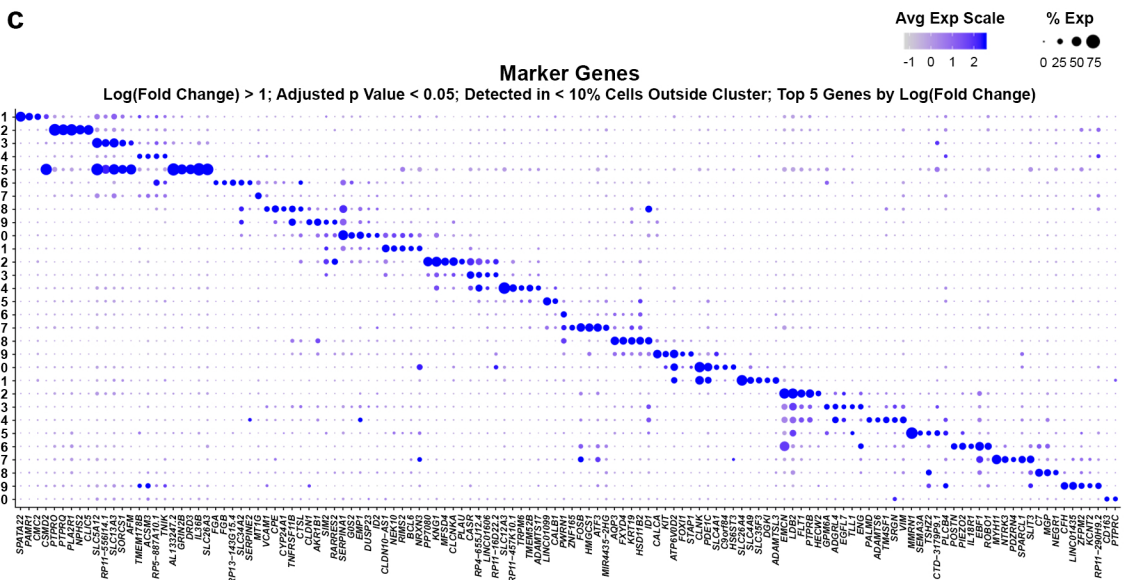

**Supplementary Figure 2. Single nucleus interrogation of the human kidney. a.** Data processing pipeline. Count matrices across experiments were combined and only nuclei detecting more than 400 non-MT UMI were included. Mitochondrial genes not expressed in the nucleus were excluded. Nuclei detecting more than 400 and less than 5000 genes were then subjected to a gene/UMI ratio filter (see Methods) to further remove low quality data prior to clustering using Pagoda2 software. Two rounds of clustering were performed to remove nuclei that failed to cluster or that formed clusters of less than 30 nuclei. This allowed further removal of low-quality nuclei or multiplets. Remaining clusters that were derived from the 17,659 post-QC nuclei were visualized by UMAP. The number of nuclei after each stage of processing are shown. **b.** Heatmap of expression of marker genes defining clusters shown in **Fig. 1b** using criteria indicated and for differentially expressed genes found in **Supplementary Data 7**. **c.** Dot plot of marker gene expression values (log scale) and percentage of nuclei expressing these genes within each cluster (**Fig. 1b**) using criteria indicated and for differentially expressed genes found in **Supplementary Data 7**.

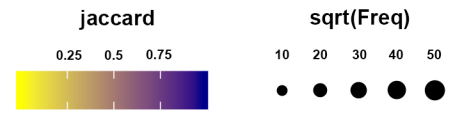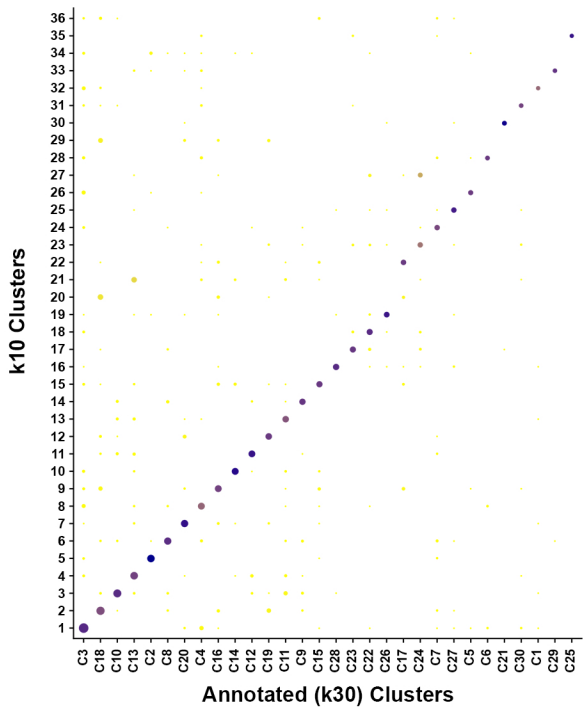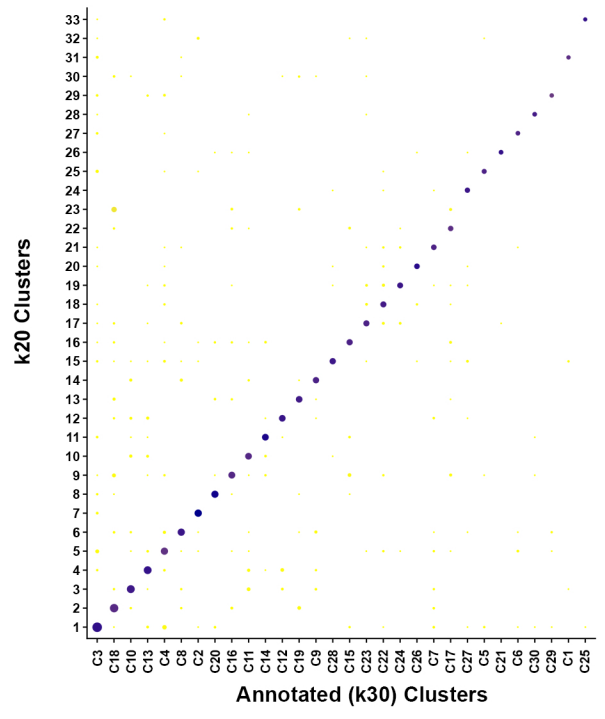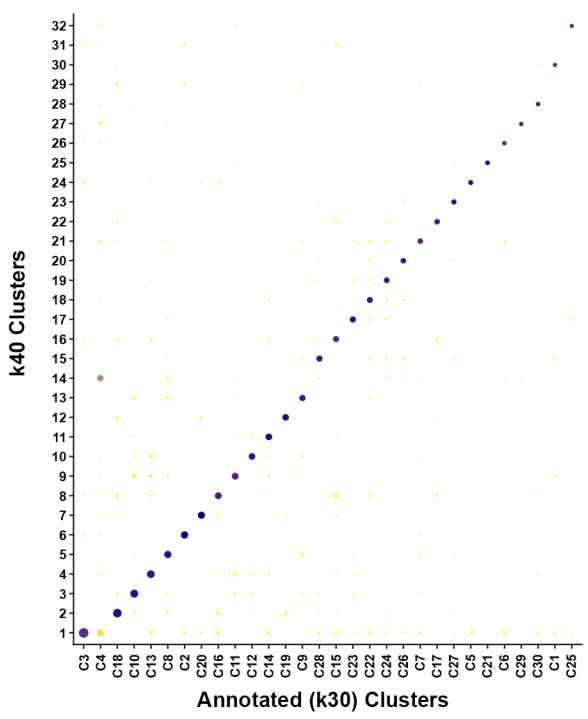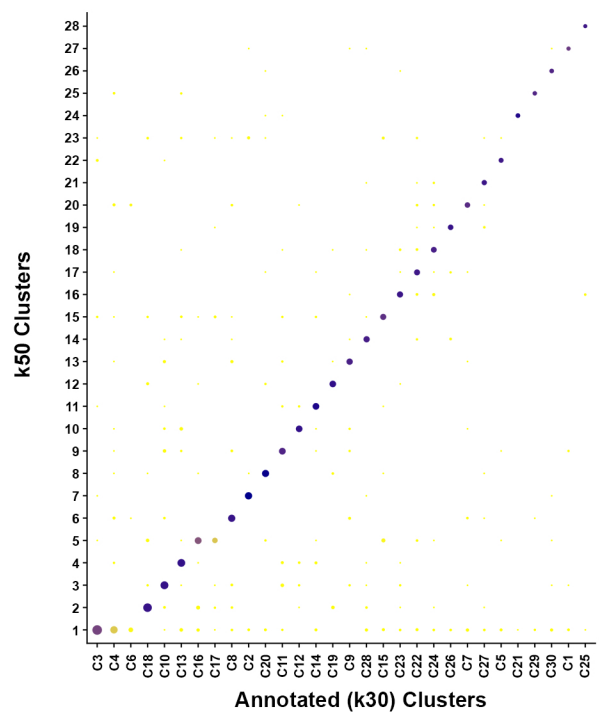

**Supplementary Figure 3. Stability of single nucleus clusters.** Cluster identities derived using different k values were compared against the final cluster identities shown in **Fig.1b** using jaccard similarity index to indicate extent of overlap for the single nuclei barcodes (see Methods). For the most part nuclei were similarly clustered at differing k values, with a few smaller sub-clusters arising at lower k values (e.g. C18 or PC-3 splitting into two additional small sub-clusters 20 and 29 at k = 10), and a few clusters merging at high k values (e.g. PT clusters C3, C4 and C6 merging into a single PT cluster at k = 50).

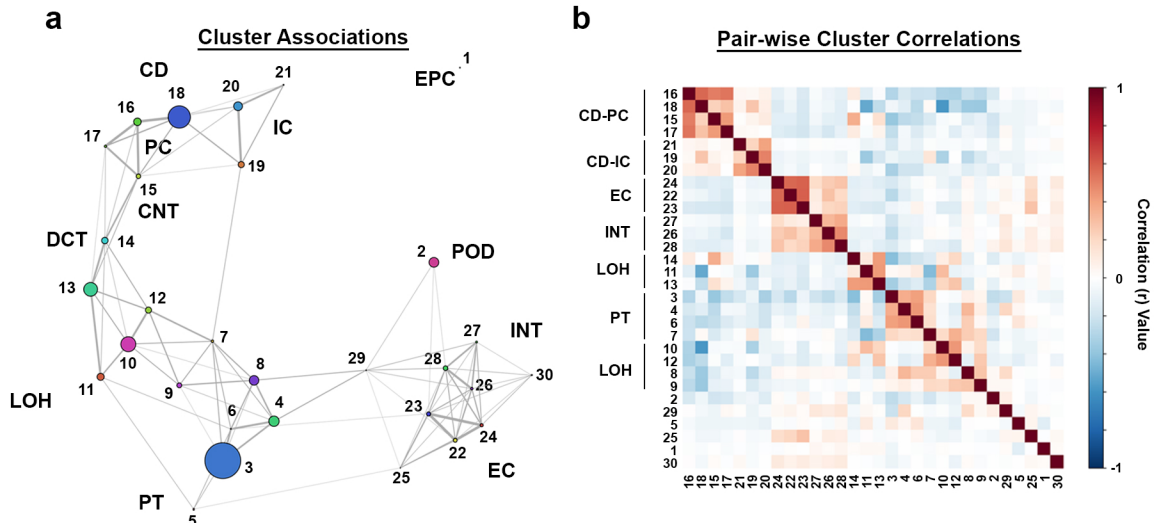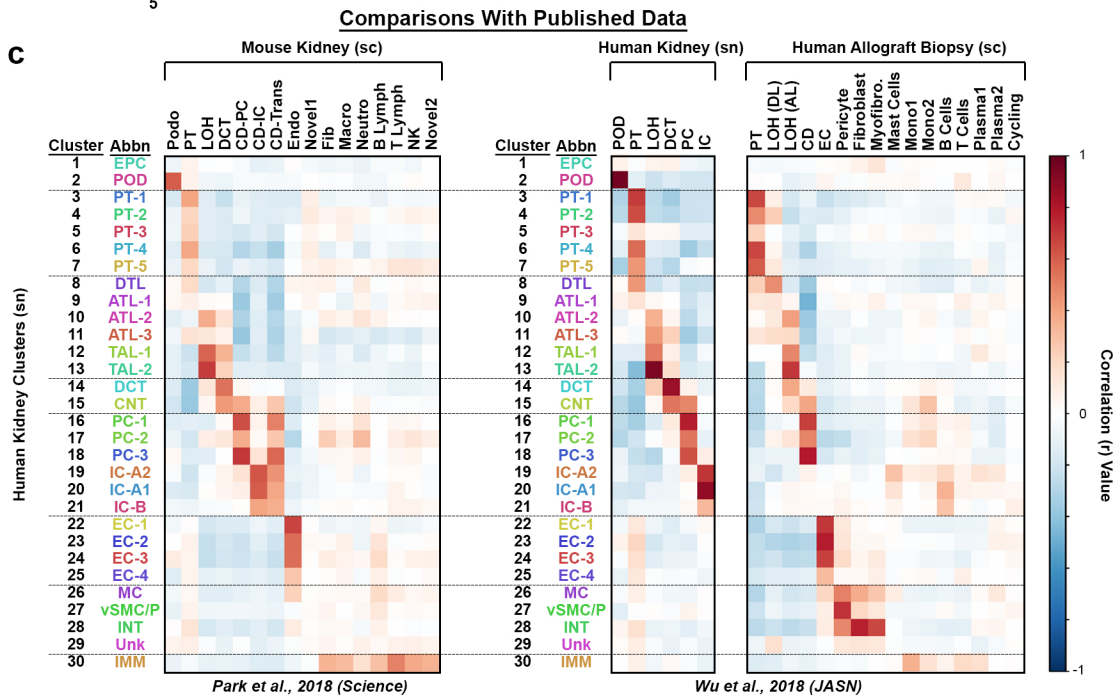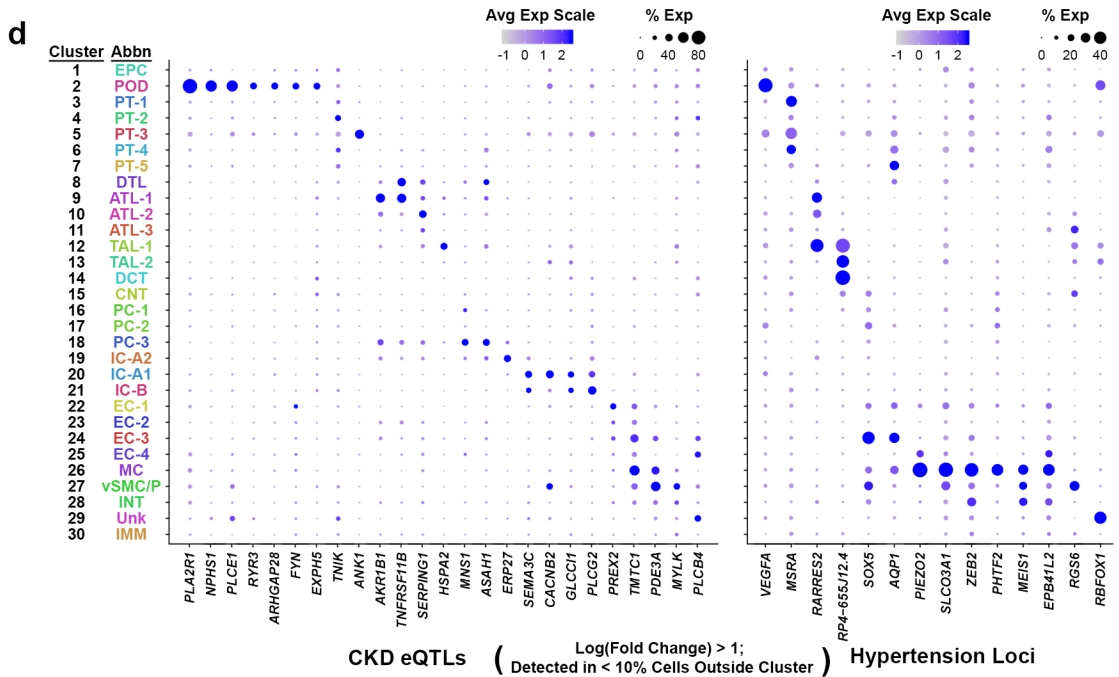

**Supplementary Figure 4. Distinct cell types resolved from single nucleus data.** **a.** A cluster association plot where thickness of connecting lines indicates relative correlation of averaged scaled expression values for the top 2000 variant genes used to define clusters, and point size indicates number of nuclei within each cluster. **b.** Hierarchical clustering (ward.D method) heatmap for pairwise correlation values that were generated on averaged scaled expression values for the top 2000 variant genes used for PAGODA2 clustering. **c.** Clusters shown in **(a)** were compared with published single-cell or single-nucleus data from the mouse or human kidney. Heatmaps show correlation values for cluster-averaged scaled expression values for shared top variant genes detected in each data set (see Methods). **d.** Dot plot of a subset of distinct CKD-associated eQTLs and hypertension risk loci expression values (log scale), and percentage of nuclei expressing these genes within each cluster (**Fig. 1b**), using the selection criteria indicated and for differentially expressed genes found in **Supplementary Data 8**.



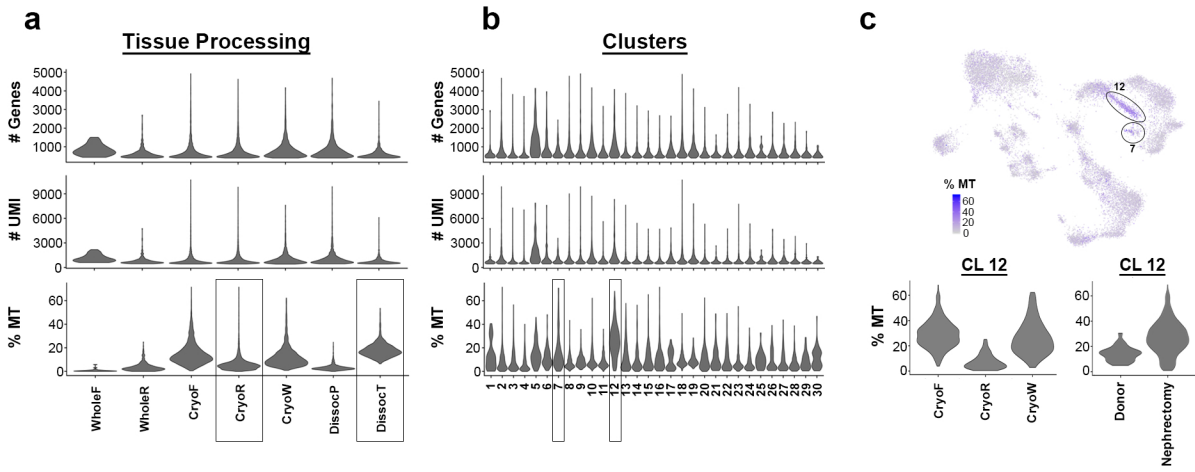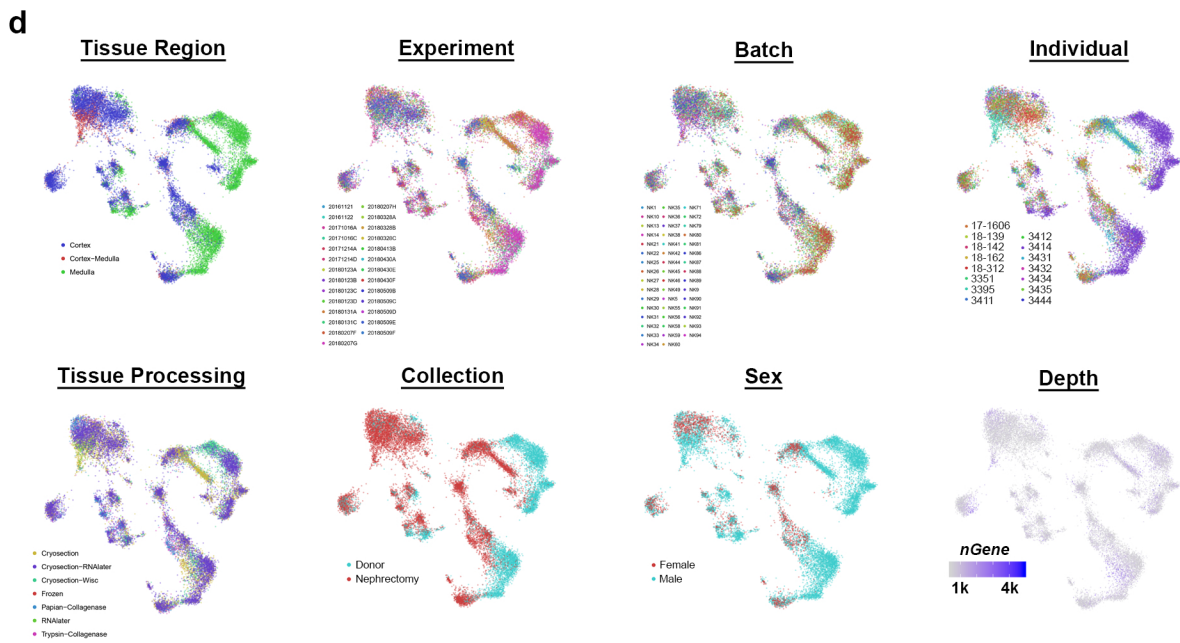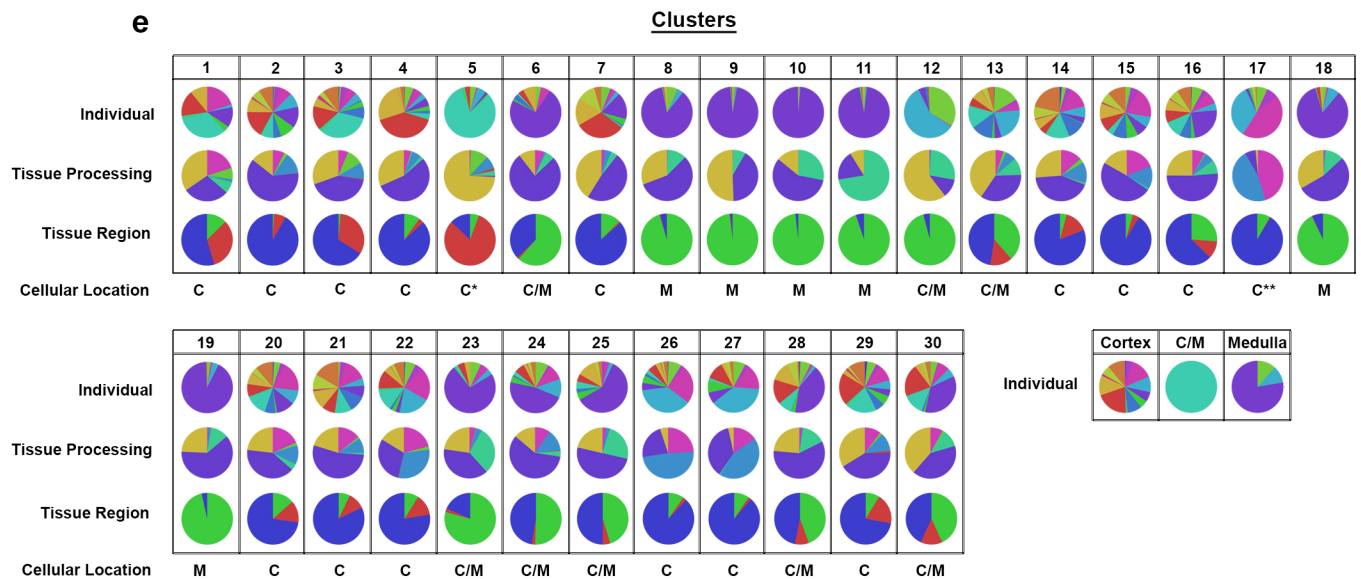

**Supplementary Figure 5. QC assessment of snDrop-seq data.** **a.** Violin plots indicating number of genes and UMI detected per nucleus and the percent MT that were detected for 17,659 post-QC nuclei (**Supplementary Data 4**) grouped by tissue processing conditions. **b.** Similar metrics as in **(a)** except for nuclei grouped by cluster identity. Boxes indicate S3 PT (PT-5, cluster 7) and TAL (TAL-1, cluster 12) clusters showing elevated %MT. **c.** UMAP plot as shown in **Fig. 1b** showing percent MT across single nuclei. Clusters highlighted in **(b)** are indicated. Violin plots show percent MT for cluster 12 (TAL-1) nuclei only grouped by either tissue processing or tissue procurement method. **d.** UMAP plots as shown in **Fig. 1b** showing different metadata components associated with each nucleus (**Supplementary Data 4**), including: tissue region, experiment, batch (library), individual, tissue processing method used, collection or procurement method, sex and gene depth. **e.** Pie charts for each cluster showing proportions contributed from different individuals, different tissue processing methods and different tissue regions. Predicted origin for each cluster to the cortex or medulla is indicated. \*Predicted artifactual cortical PT cluster derived mostly from a single individual. \*\*Predicted artifactual CD cluster derived primarily from tissue processing methods involving enzymatic dissociation (dissocPC and dissocTC). Source data for **(e)** is provided as a Source Data File.

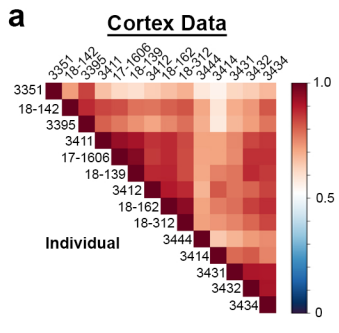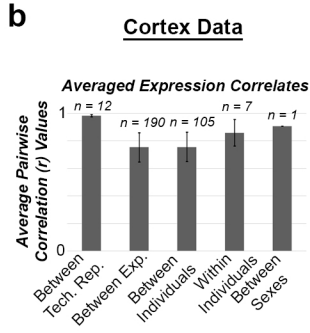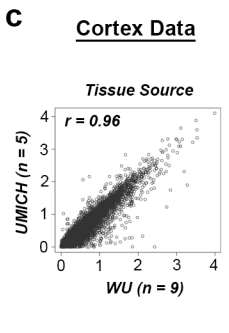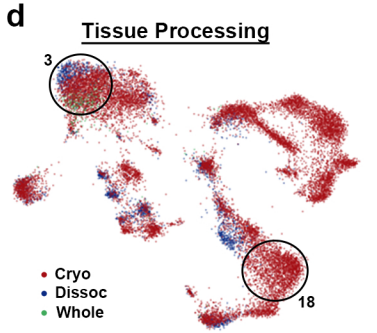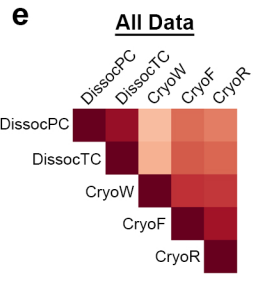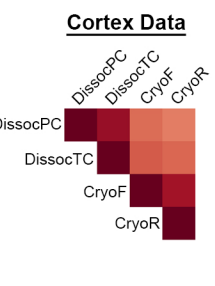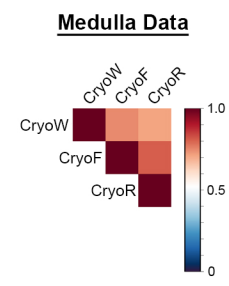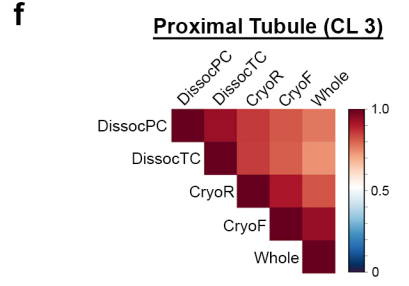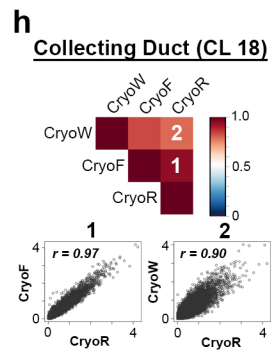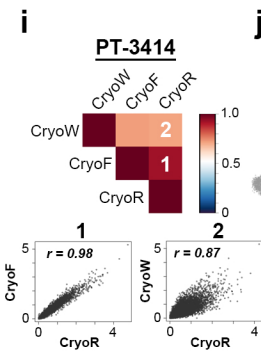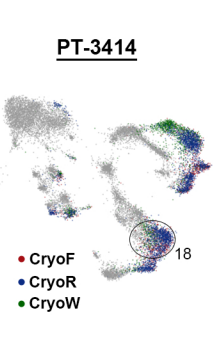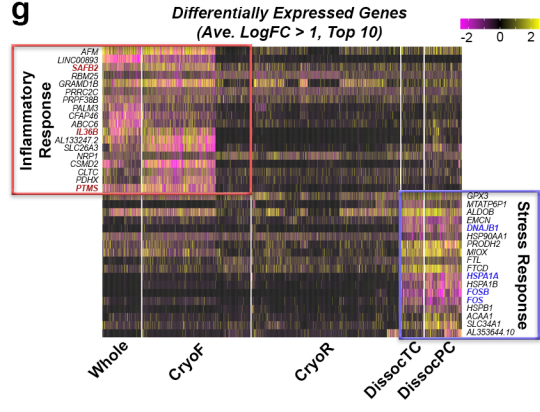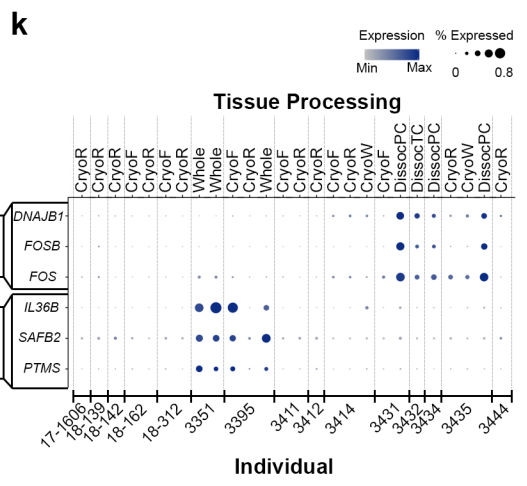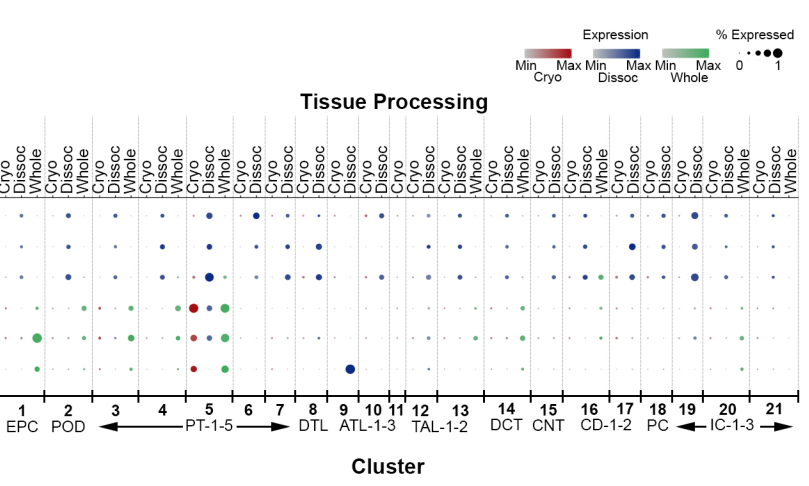

**Supplementary Figure 6. QC and reproducibility assessment across individuals and tissue processing methods.** **a.** Heatmap of Pearson correlation values ( $r$ ) that were generated on averaged expression values (all genes) for nuclei grouped by the different individuals they were isolated from (renal cortex data only, 14 individuals). **b.** Bar chart of averaged correlation values generated on nuclei (cortex data only) grouped by the conditions indicated. Correlations were based on average expression values (all genes),  $n$  refers to the number of comparisons performed, and error bars indicate standard deviation (sd) between comparisons. Source data is provided as a Source Data File. **c.** Scatter plot for averaged gene expression values (log transformed) for nuclei grouped by tissue source. Associated correlation value and number of individuals (cortex only) the nuclei were derived from are indicated. **d.** UMAP as shown in **Fig. 1b** showing general tissue processing methods used. PT cluster 3 and CD PC cluster 18, used in subsequent analyses, are indicated. **e.** Correlation heatmaps for averaged expression of all genes separately performed on all nuclei, cortex-only nuclei or medulla-only nuclei that were grouped by tissue processing method. **f.** Correlation heatmap for averaged expression of all genes performed on PT cluster 3 nuclei grouped by tissue processing method. **g.** Heatmap of differentially expressed genes identified between tissue processing methods (average log(fold-change) > 1, top 10 genes shown) for PT cluster 3. Gene categories (Inflammatory Response and Stress Response) were based on highlighted genes. **h.** Correlation heatmap for averaged expression of all genes performed on CD cluster 18 nuclei grouped by tissue processing method. Representative scatter plots for comparisons indicated are shown. **i.** Correlation heatmap for averaged expression of all genes performed on nuclei from a single individual (patient 3414) grouped by tissue processing method. Representative scatter plots for comparisons indicated are shown. **j.** UMAP as shown in **Fig. 1b** showing general tissue processing methods used specifically for patient 3414. Cluster 18 is indicated. **k.** Dot plot showing gene expression and associated detection rates for genes highlighted in **(g)** for all 17,659 post-QC nuclei grouped by the conditions indicated. Stress response genes show as specific for dissociated postnatal cortex (dissocPC/TC) and across all clusters, indicating a general tissue processing effect. Inflammatory response genes associate with specific individuals (3351/3395) and were found more in PT clusters, likely reflecting an individual-related artifact rather than a tissue processing effect.

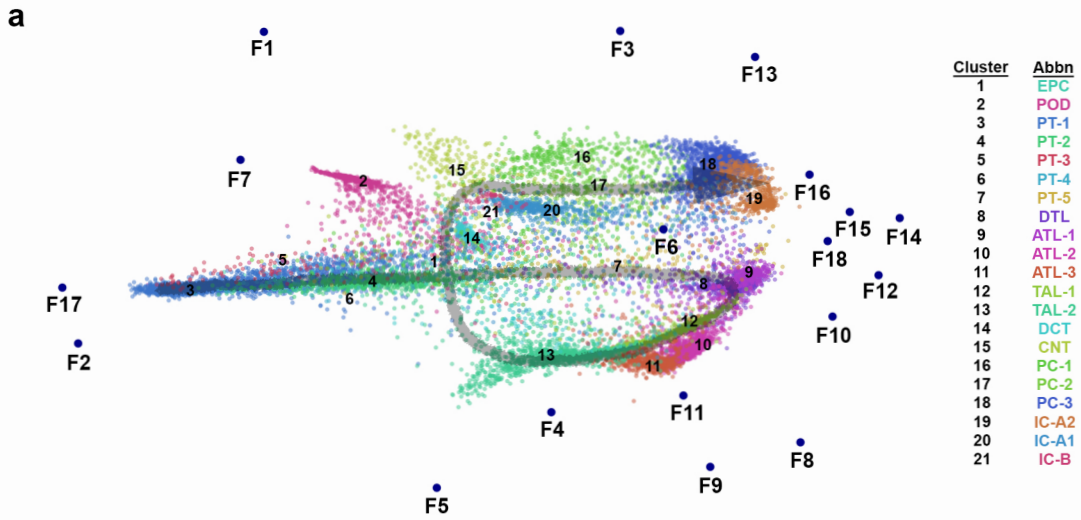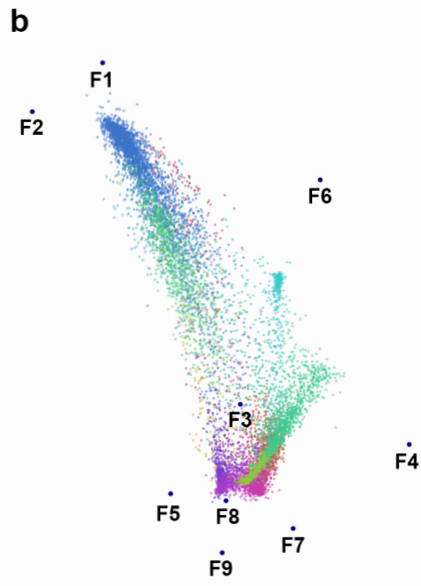

**c** Top Factor Associated Genes (Score > 0.25)

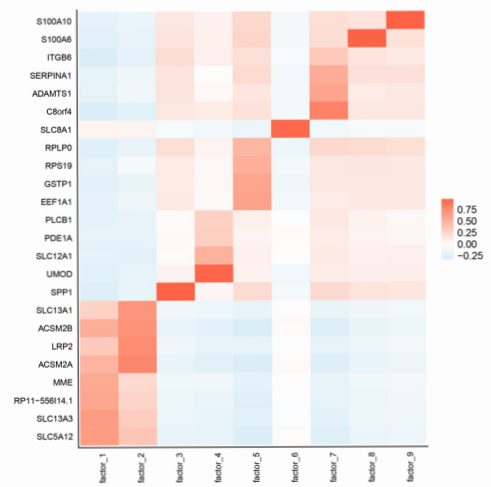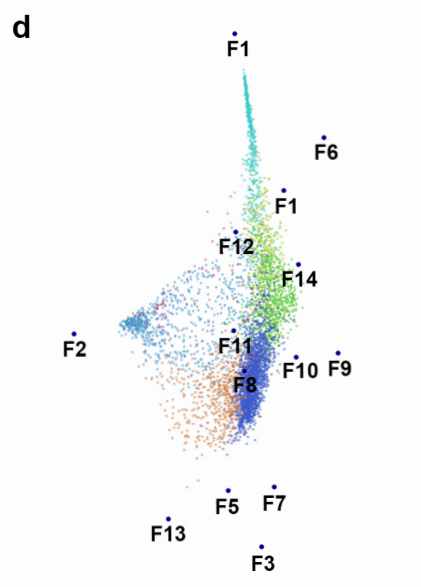

**e** Top Factor Associated Genes (Score > 0.25)

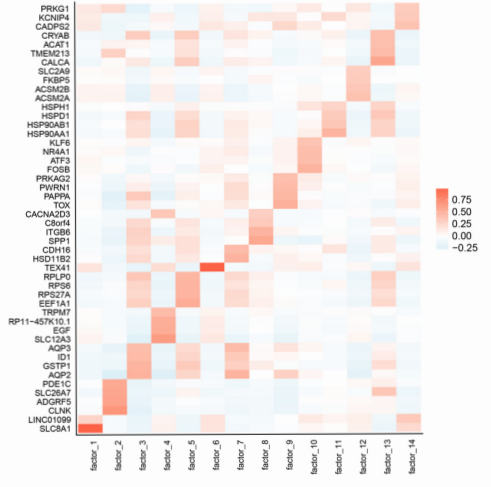

**Supplementary Figure 7. SWNE analyses.** **a.** Nephron and collecting duct cell populations (clusters 1-21) were visualized using SWNE (see Methods). Arrow indicates expected tubular progression of cell types seen *in vivo*. NMF factors (F1-F18) driving the spatial distribution of the nuclei are indicated. **b.** Spatial distribution of renal tubule cell populations (clusters 2-14) visualized using SWNE. Associated NMF factors (F1-F9) are shown. **c.** Heatmap of the top genes associated with factors shown in **(b)**. **d.** Spatial distribution of distal tubules through collecting duct cell populations (clusters 14-21) visualized using SWNE. Associated NMF factors (F1-F14) are shown. **e.** Heatmap of the top genes associated with factors shown in **(d)**. All factor associated genes can be found in **Supplementary Data 9**.



**Supplementary Figure 8. Progressive renal tubule cell types.** **a.** UMAP plots as in **Fig. 1b** showing relative expression levels (scaled from low - gray to high - blue) of associated markers in indicated cell types and corresponding protein immunostainings (Human Protein Atlas<sup>1</sup>, **Supplementary Data 16**). Scale bar indicates 25  $\mu\text{m}$ . **b.** Trajectory analysis of main PT clusters supporting their S1, S2 and S3 PT segment identities as shown in **Fig. 3b**. Heatmap of expression (row Z-scores) for genes differentially expressed (q value  $< 1e^{-30}$ , see Methods) along the proximal tubule trajectory shown in **(b)** that were grouped into three gene sets by hierarchical clustering (**Supplementary Data 10**, see Methods). Associated gene ontologies are indicated for gene sets 1 and 3. **c.** Dot plot of average marker gene expression values (log scale) and percentage of nuclei expressing these genes for a subset of nephron clusters (**Fig. 1b**). Genes shown are those found to be differentially expressed (**Supplementary Data 7**) and that exhibit distinct segment-specific expression in prior studies (**Supplementary Data 5**).



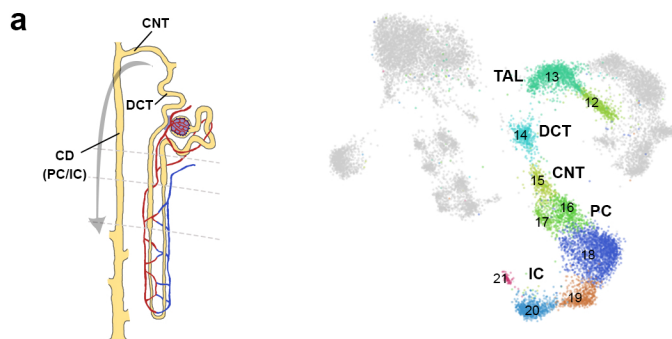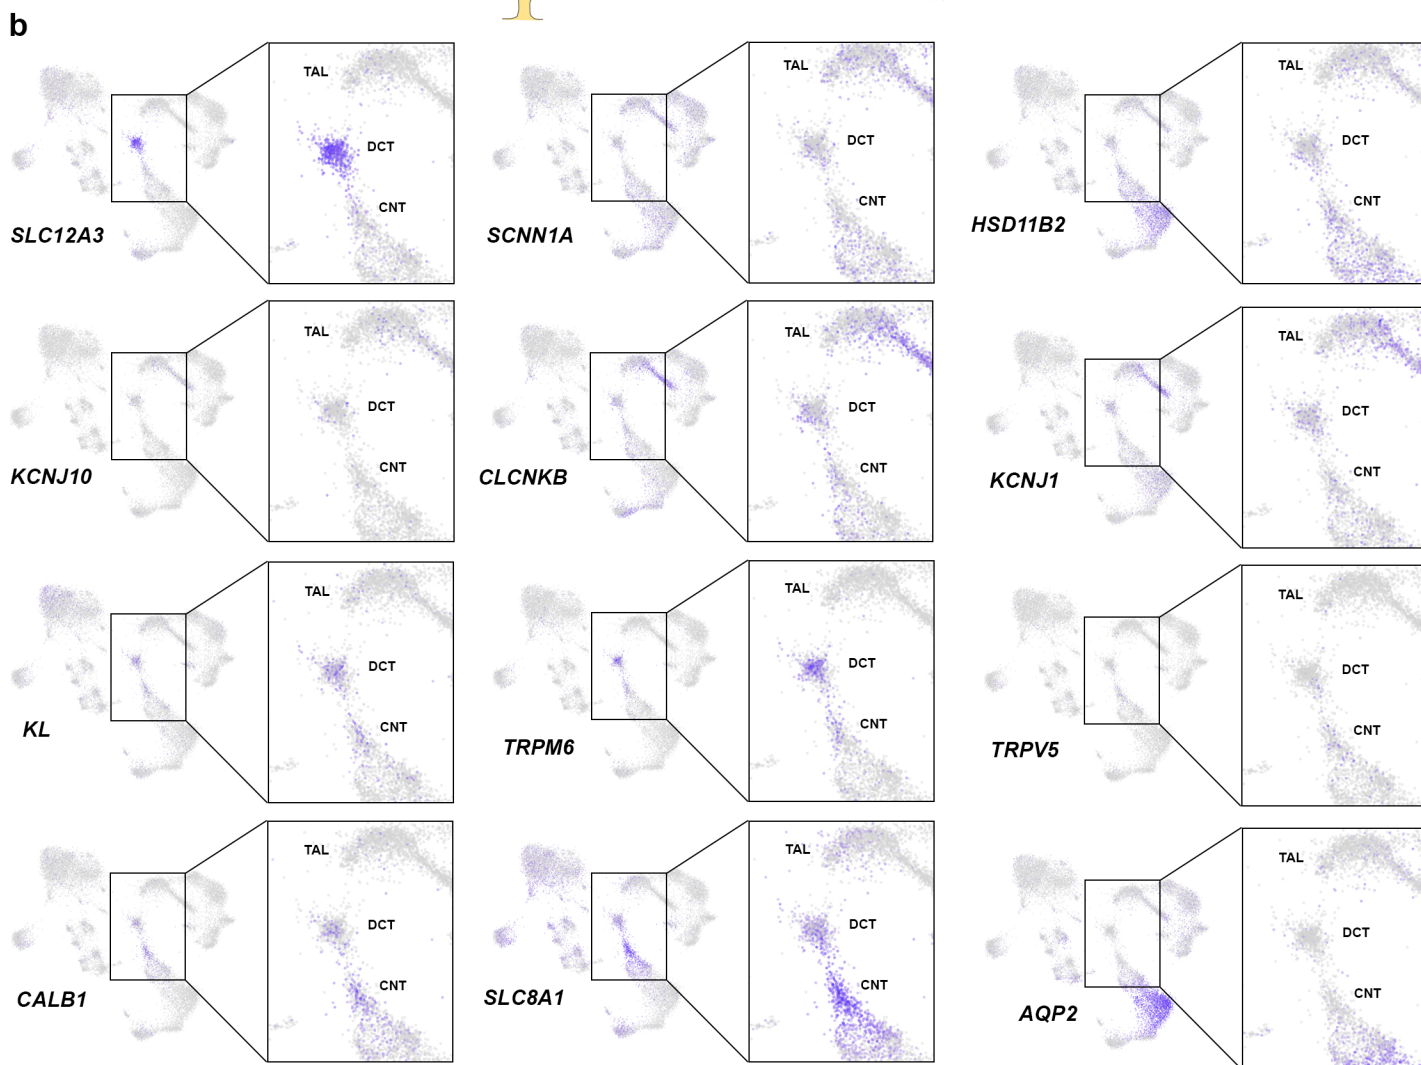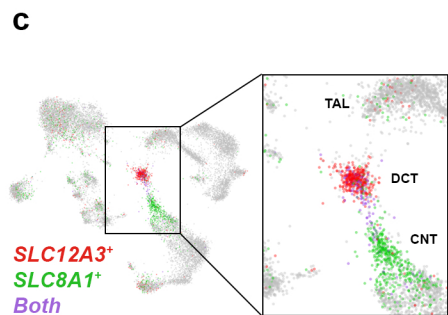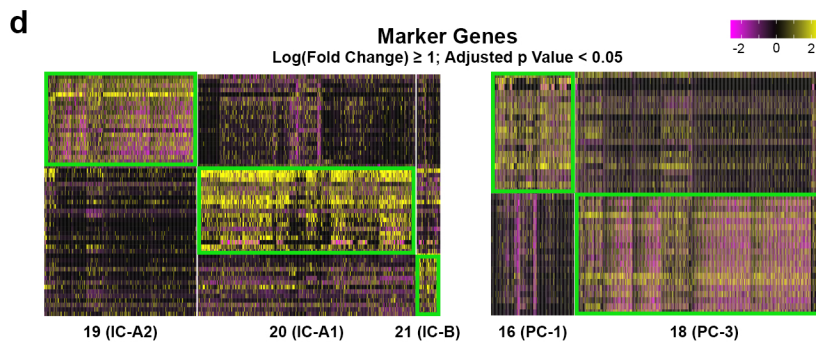

**Supplementary Figure 9. Distinct DCT, CNT and CD expression profiles.** **a.** Schematic of the kidney nephron and UMAP as shown in **Fig. 1b** showing relevant cell populations. **b.** UMAP plots as in **Fig. 1b** showing relative expression levels (scaled from low - gray to high - blue) of genes associated with DCT and CNT function. **c.** UMAP plots as in **Fig. 1b** showing high expressing cells for the DCT marker *SLC12A3* (red) or the CNT marker *SLC8A1* (green), or both (purple). **d.** Heatmap of expression of marker genes defining IC and PC clusters using criteria indicated and for differentially expressed genes found in **Supplementary Data 11-12.**

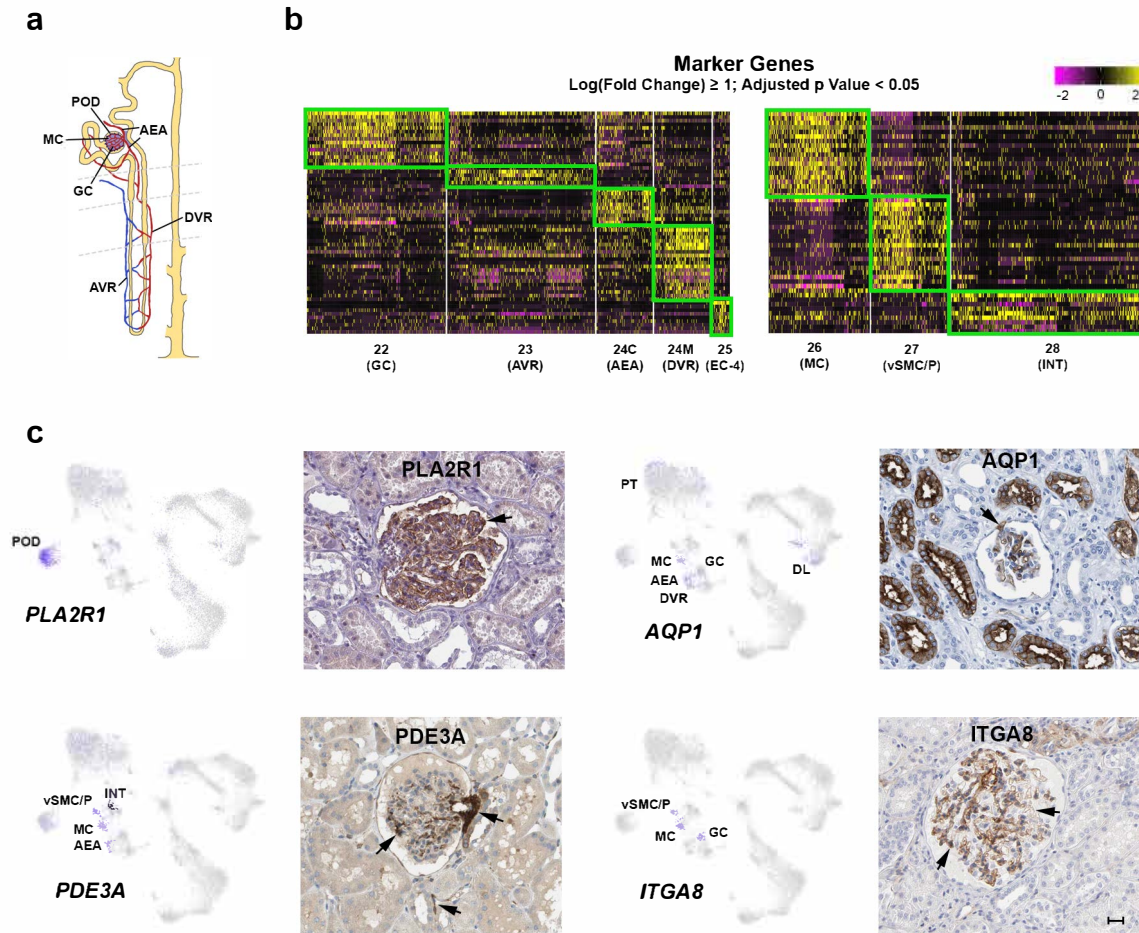

**Supplementary Figure 10. Endothelial and interstitial populations.** **a.** Schematic of the kidney nephron showing relevant cell populations. **b.** Heatmap of expression of marker genes defining EC and INT populations using criteria indicated and for differentially expressed genes found in **Supplementary Data 13-14**. **c.** UMAP plots as in **Fig. 1b** showing relative expression levels (scaled from low - gray to high - blue) of associated markers in indicated cell types and corresponding protein immunostainings (Human Protein Atlas<sup>1</sup>, **Supplementary Data 16**). Arrows indicate representative protein localization. Scale bar indicates 25  $\mu\text{m}$ .

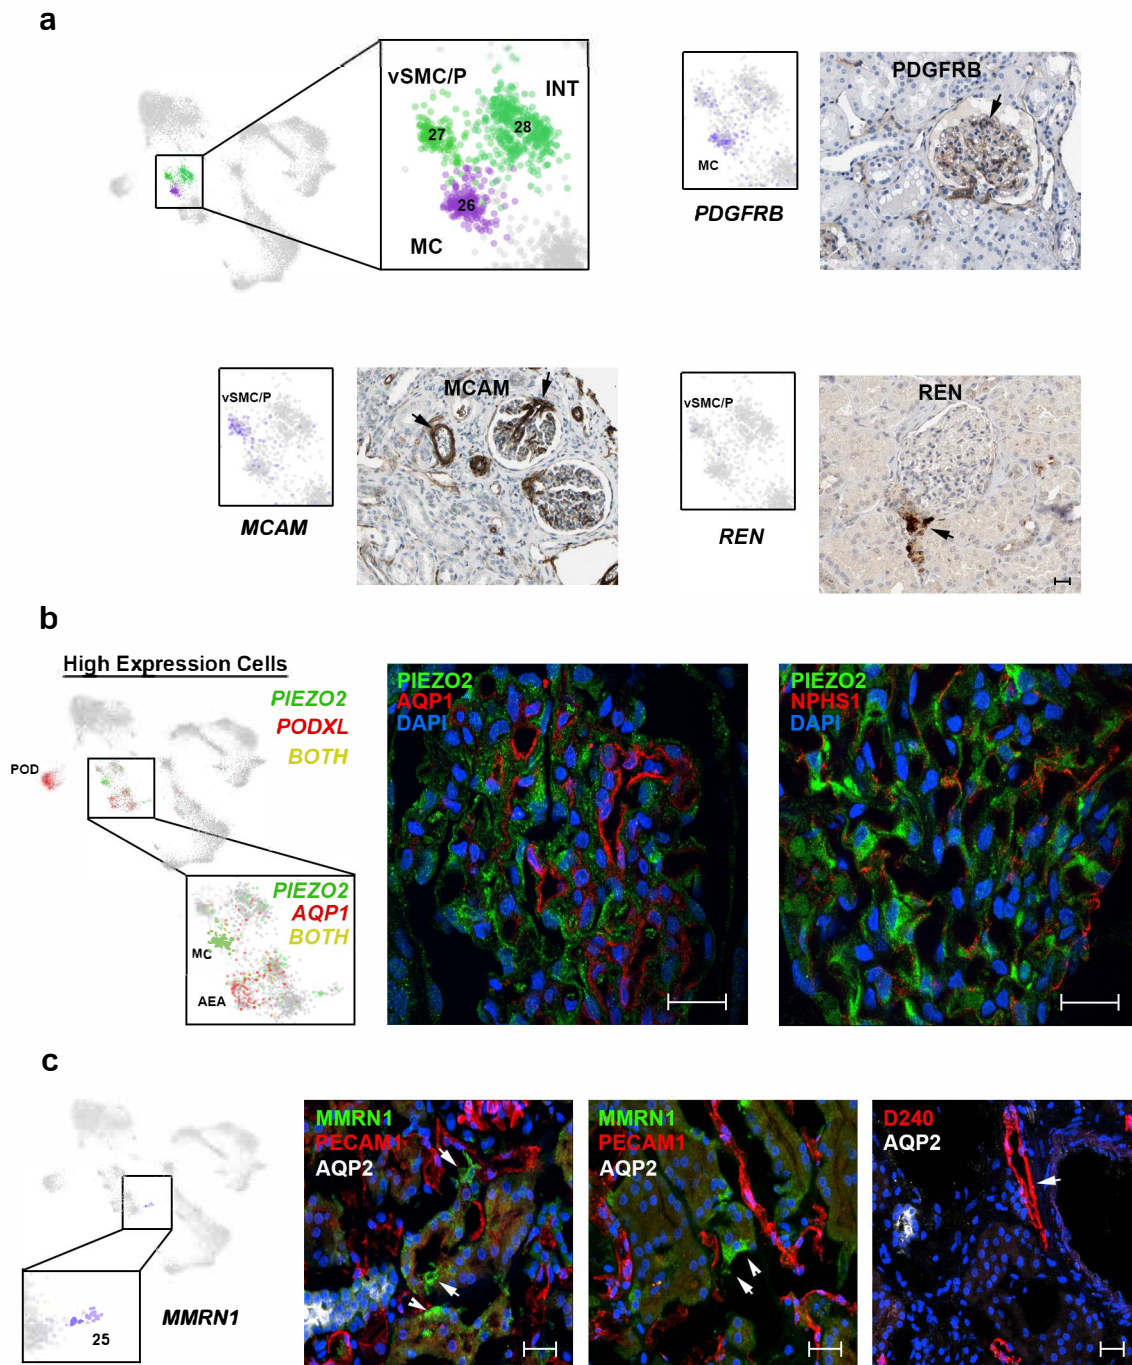

**Supplementary Figure 11. Endothelial and interstitial populations. a.** UMAP plots as in **Fig. 1b** showing relative expression levels (scaled from low - gray to high - blue) of associated markers in indicated cell types and corresponding protein immunostainings (Human Protein Atlas<sup>1</sup>, **Supplementary Data 16**). Arrows indicate representative protein localization. Scale bar indicates 25  $\mu$ m. **b.** UMAP plots as in **Fig. 1b** indicating high expressing cells for *PIEZO2* (green) and *PODXL* or *AQP1* (red). Cells expressing both are indicated in yellow. Protein fluorescent immunostaining (**Supplementary Data 17**) for *PIEZO2* in MC, *AQP1* in GCs and *NPHS1* in POD. Scale bar indicates 20  $\mu$ m. **d.** UMAP plots as in **Fig. 1b** showing relative expression levels (scaled from low - gray to high - blue) of *MMRN1* specific to EC-4 (cluster 25). Protein fluorescent immunostaining (**Supplementary Data 17**) for *MMRN1*, vascular marker *PECAM1* (CD31), PC marker *AQP2* and lymphatic marker *D240*. Closed arrows indicate *MMRN1* extra-tubular staining in interstitial vessels, open arrows indicate *MMRN1* intra-tubular staining. Scale bar indicates 25  $\mu$ m.

## Tissue Processing Pipeline

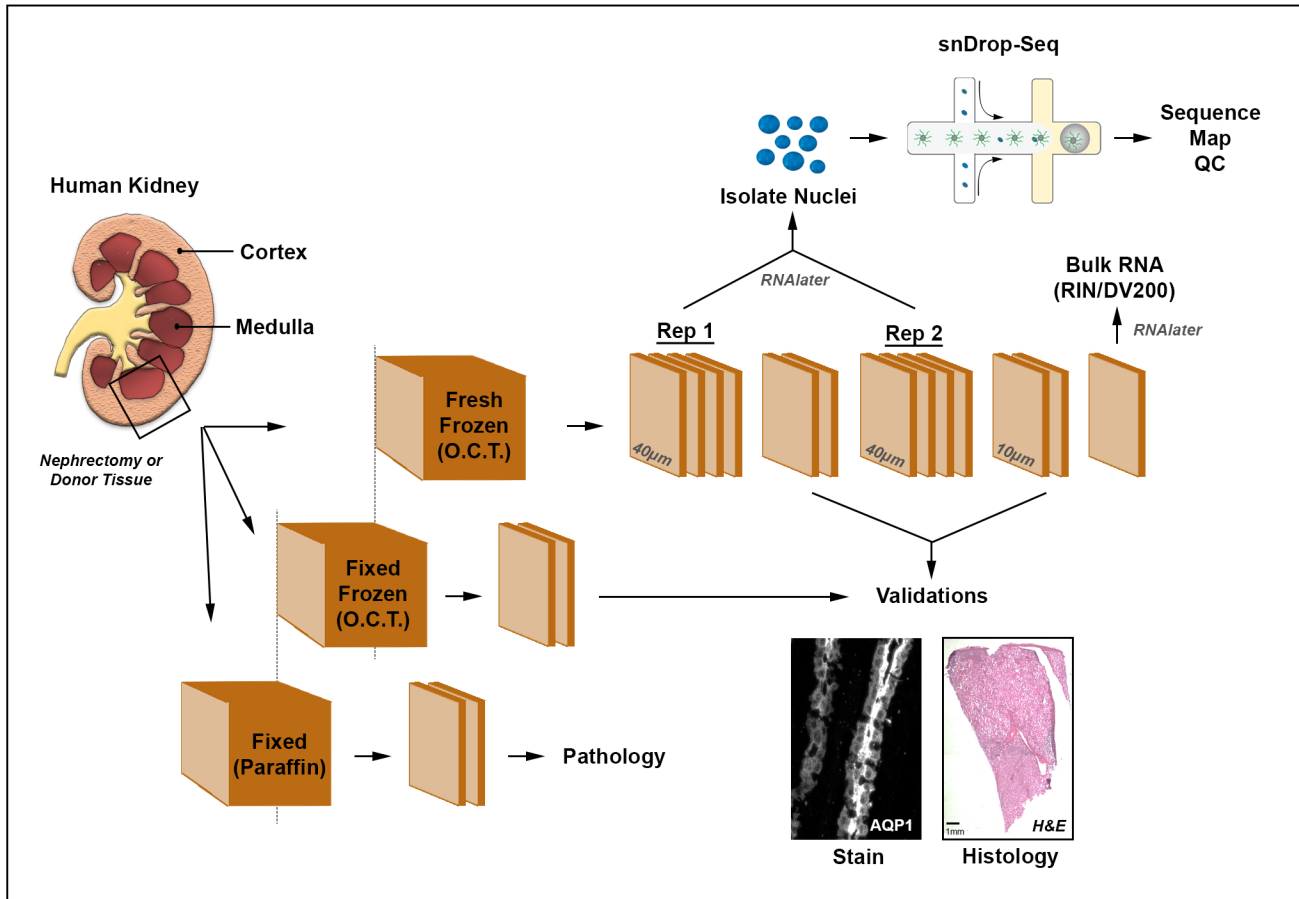

**Supplementary Figure 12. Optimized tissue processing pipeline.** Overview of pipeline applied to adult human kidney. Tissue is segmented into three blocks: paraffin fixed for pathological assessment; fixed and O.C.T. embedded/frozen for protein immunostaining validation/spatial registration assays; unfixed and O.C.T. embedded/frozen for single nucleus assays, bulk RNA assessment and validation/spatial registration assays. Frozen tissues permit parallel sections to be used in multiple complementary assays, specifically: 1) Thick sections are transferred to RNAlater for nuclei isolation and snDrop-Seq; 2) adjacent thin sections are used for histological assessment for tissue integrity and composition; 3) parallel thick sections can be used for technical replicates and increased sampling depth; 4) parallel thick section can be transferred to RNAlater for bulk RNA isolation and quality assessment (RNA integrity number or RIN, DV200) and for bulk RNA-seq.

## Supplementary Note 1

### Kidney Precision Medicine Project Consortium

Theodore Alexandrov<sup>1</sup>, Charles Alpers<sup>2</sup>, Chris Anderton<sup>3</sup>, Paul Appelbaum<sup>4</sup>, Joseph Ardayfio<sup>5</sup>, Tanim Arora<sup>6</sup>, Tarek Ashkar<sup>7</sup>, Mark Auliso<sup>8</sup>, Evren Azeloglu<sup>9</sup>, Olivia Balderes<sup>4</sup>, Ulysses Balis<sup>10</sup>, Jonathan Barasch<sup>4</sup>, Laura Barisoni<sup>11</sup>, Daria Barwinska<sup>7</sup>, Jack Bebiak<sup>7</sup>, Kristina Blank<sup>2</sup>, Andrew Bomback<sup>4</sup>, Mary Bray<sup>2</sup>, Keith Brown<sup>12</sup>, Will Bush<sup>13</sup>, Taneisha Campbell<sup>10</sup>, Catherine Campbell<sup>14</sup>, Leslie Cooperman<sup>13</sup>, Dana Crawford<sup>13</sup>, Vivette D'agati<sup>4</sup>, Pierre Dagher<sup>7</sup>, Ian De Boer<sup>2</sup>, Ashveena Dighe<sup>2</sup>, Dejan Dobi<sup>15</sup>, Kenneth Dunn<sup>7</sup>, Michael Eadon<sup>7</sup>, Michele Elder<sup>16</sup>, Michael Ferkowicz<sup>7</sup>, Malia Fullerton<sup>2</sup>, Yury Goltsev<sup>17</sup>, Nir Hacohen<sup>18</sup>, Daniel Hall<sup>16</sup>, Habib Hamidi<sup>10</sup>, Lynda Hayashi<sup>12</sup>, Cijang (John) He<sup>9</sup>, Oliver He<sup>10</sup>, Susan Hedayati<sup>14</sup>, Leal Herlitz<sup>13</sup>, Jonathan Himmelfarb<sup>2</sup>, Jeffrey Hodgins<sup>10</sup>, Paul Hoover<sup>18</sup>, Ravi Iyengar<sup>9</sup>, Nichole Jefferson<sup>2</sup>, Maria Joanes<sup>15</sup>, John Kellum<sup>16</sup>, Katherine Kelly<sup>7</sup>, Asra Kermani<sup>14</sup>, Krzysztof Kiryluk<sup>4</sup>, Richard Knight<sup>19</sup>, Robert Koewler<sup>20</sup>, Matthias Kretzler<sup>10</sup>, Mary Kruth<sup>16</sup>, Zoltan Laszik<sup>15</sup>, Stewart Lecker<sup>22</sup>, Simon Lee<sup>14</sup>, Chrysta Lienczewski<sup>10</sup>, Christopher Lu<sup>14</sup>, Randy Luciano<sup>6</sup>, Laura Mariani<sup>10</sup>, Robyn McClelland<sup>2</sup>, Gearoid McMahon<sup>22</sup>, Karla Mehl<sup>4</sup>, Steven Menez<sup>23</sup>, Raji Menon<sup>10</sup>, Tyler Miller<sup>14</sup>, Orson Moe<sup>14</sup>, Dennis Moledina<sup>6</sup>, Sean Mooney<sup>2</sup>, Raghav Murugan<sup>16</sup>, Garry Nolan<sup>17</sup>, George (Holt) Oliver<sup>24</sup>, John O'toole<sup>13</sup>, Edgar Otto<sup>10</sup>, Paul Palevsky<sup>16</sup>, Chirag Parikh<sup>23</sup>, Samir Parikh<sup>25</sup>, Christopher Park<sup>2</sup>, Harold Park<sup>14</sup>, Ljiljana Pasa-Tolic<sup>3</sup>, Emilio Poggio<sup>13</sup>, Parmjeet Randhawa<sup>16</sup>, Glenda Roberts<sup>2</sup>, Sylvia Rosas<sup>5</sup>, Avi Rosenberg<sup>6</sup>, Matthew Rosengart<sup>16</sup>, Kamalanathan Sambandam<sup>14</sup>, Francisco Sanchez<sup>14</sup>, Minnie Sarwal<sup>15</sup>, John Saul<sup>2</sup>, Jennifer Schaub<sup>10</sup>, Andrew Schroeder<sup>15</sup>, Rachel Sealfon<sup>26</sup>, John Sedor<sup>13</sup>, Ning (Sunny) Shang<sup>4</sup>, Stuart Shankland<sup>2</sup>, Kumar Sharma<sup>27</sup>, Anna Shpigel<sup>23</sup>, Tara Sigdel<sup>15</sup>, Sunny Sims-Lucas<sup>16</sup>, Rebecca Steck<sup>10</sup>, Mary Stefanick<sup>16</sup>, Isaac Stillman<sup>22</sup>, Stacy Stull<sup>16</sup>, Edith Christine Stutzke<sup>12</sup>, Swastika Sur<sup>15</sup>, Timothy Sutton<sup>7</sup>, Jose Torrealba<sup>14</sup>, Robert Toto<sup>14</sup>, Olga Troyanskaya<sup>26</sup>, Mitchell Tublin<sup>16</sup>, Katherine Tuttle<sup>12</sup>, Ugwuowo Ugochukwu<sup>6</sup>, Miguel Vasquez<sup>14</sup>, Dusan Velickovic<sup>3</sup>, Pam Villalobos<sup>23</sup>, Sus Waikar<sup>22</sup>, Nancy Wang<sup>14</sup>, Astrid Weins<sup>22</sup>, Chenhua Weng<sup>4</sup>, Mark Williams<sup>5</sup>, Kayleen Williams<sup>2</sup>, Francis Perry Wilson<sup>6</sup>, Seth Winfree<sup>7</sup>, Lorenda Wright<sup>27</sup>, Guanshi Zhang<sup>27</sup>, Blue B. Lake<sup>28</sup>, Masato Hoshi<sup>20</sup>, Diane Salamon<sup>20</sup>, Amanda Knoten<sup>20</sup>, Anitha Vijayan<sup>20</sup>, Joseph Gaut<sup>20</sup>, Kun Zhang<sup>28</sup>, Sanjay Jain<sup>20</sup>

<sup>1</sup>European Molecular Biology Laboratory, Germany

<sup>2</sup>University of Washington, WA

<sup>3</sup>Pacific Northwest National Laboratories, WA

<sup>4</sup>Columbia University, NY

<sup>5</sup>Joslin Diabetes Center, MA

<sup>6</sup>Yale University, CT

<sup>7</sup>Indiana University, IN

<sup>8</sup>Case Western Reserve, OH

<sup>9</sup>Mount Sinai, NY

<sup>10</sup>University of Michigan, MI

<sup>11</sup>Duke University, NC

<sup>12</sup>Providence Health, WA

<sup>13</sup>Cleveland Clinic, OH

<sup>14</sup>UT Southwestern, TX

<sup>15</sup>UC San Francisco, CA

<sup>16</sup>University of Pittsburgh, PA

<sup>17</sup>Stanford University, CA

<sup>18</sup>Broad Institute, MA

<sup>19</sup>American Association of Kidney Patients, FL

<sup>20</sup>Washington University St. Louis, MO

<sup>21</sup>Beth Israel Deaconess, MA

<sup>22</sup>Brigham & Women's Hospital, MA

<sup>23</sup>John Hopkins University, MD

<sup>24</sup>Parkland Hospital, TX

<sup>25</sup>Ohio State University

<sup>26</sup>Princeton University, NJ

<sup>27</sup>UT Health San Antonio, TX

<sup>28</sup>UC San Diego, CA

## REFERENCES

1. Uhlen, M. *et al.* Proteomics. Tissue-based map of the human proteome. *Science* **347**, 1260419 (2015).
